# Supplementary material
Source: publisher figshare collection journal article supplement (https://springernature.figshare.com/ndownloader/files/17992463)
Supplement: Supplementary file 1 [file 17992463]

## Sheet: 解析用
No	Height [cm]	Weight [kg]	BMI [kg/m2]	Donor type (deceased 0 / living 1)	ABO-incompatible KT	Calcineurin inhibitor (cyclosporine 0 / tacrolimus 1)	Antimetabolites or everolimus	Diabetes mellitus	Hypertension	Handgrip strength [kg]	Gait speed [m/s]	Skeletal muscle mass index [kg/m2]	Gait speed < 0.8	Handgrip strength < 26 (male), < 18 (female)	skeletal muscle mass index < 7.0 (male), < 5.7 (female)	Sarcopenia	Hb	Alb	FBS	sCr	cys-C	eGFR	HbA1c	Ca	P	HDL	LDL	TG	Phase Angle °	Total body water/lean mass	CRP
1	170.1	57.7	19.9	0	0	0	MMF	0	1	39	1.7331	7.05053	0	0	0	0	12.7	4.1	96	1.52	1.41	54	5.3	9.5	2.2	67	76	113	5.46368	73.7288	0.11
2	176.2	73	23.5	0	0	1	MMF	1	1	46	1.0582	8.0911	0	0	0	0	15.3	4.5	120	1.68	1.24	52	7.1	9.9	3.5	63	121	120	5.81246	73.8899	0.04
3	177.3	71.4	22.7	0	1	1	MMF	0	1	37	1.63934	9.47343	0	0	0	0	12.8	4	115	1.4	1.57	45	7.1	9.7	3.3	79	92	94	4.97688	74.6114	0.07
4	166.3	58	21	1	0	0	MMF	0	0	25	1.43164	6.57008	0	1	1	1	14.8	4.3	88	1.19	1.39	56	5.2	9.8	3.6	54	82	155	3.95877	74.0196	0.06
5	153.1	60.6	25.9	0	0	0	MMF	0	1	27	1.41343	5.77228	0	0	0	0	13.1	4.2	86	0.78	1.1	69	6	9.7	3.6	53	95	320	4.32416	73.9377	0.04
6	168.9	60	21	0	1	0	MMF	0	1	29	0.996016	7.52615	0	0	0	0	10.9	3.7	110	1.2	1.36	53	5.5	9.3	2.6	47	150	146	4.4303	74.1379	0.08
7	150.5	45	19.9	0	0	0	MMF	0	0	17	1.2837	5.73945	0	1	0	0	13.4	3.9	89	1.23	1.37	52	5.5	9.1	2.9	84	117	98	5.20512	72.5212	0.02
8	162.3	57.3	21.8	0	0	1	MMF	0	0	28	1.38889	6.36643	0	0	0	0	12.4	4.7	88	1.31	1.41	47	5.3	9.5	3.2	56	157	156	5.32594	73.3173	0.01
9	166.4	67.1	24.2	0	0	1	MMF	1	1	31	1.37836	8.5702	0	0	0	0	11.8	3.7	249	1.87	1.98	33	7.1	9	3	92	103	91	4.96137	73.9464	1.03
10	168.5	66.3	23.4	1	0	0	EVR	0	0	32	1.16009	6.92795	0	0	1	0	14.2	3.9	116	1.09	1.11	69	6.3	9.5	3.1	90	55	135	4.59407	74.2317	0.02
11	183	62	18.5	0	0	0	MMF	0	1	42	1.65975	7.9877	0	0	0	0	11.1	3.6	81	1.68	2.2	34	6	9.3	3.2	61	81	117	4.88509	74.6789	0.64
12	171.6	53	18	0	0	1	MMF	0	0	29	1.30208	6.75801	0	0	1	0	14.1	3.7	84	1.06	1.05	77	5.5	9.3	2.8	84	123	93	5.02877	74	0.02
13	170.3	66	22.8	0	0	1	MMF	1	0	37	1.28617	7.37188	0	0	0	0	15.6	4	110	1.15	0.95	81	8	9.8	3.3	37	63	294	6.37293	73.4568	0.05
14	165.4	55	20.1	0	0	1	MMF	0	1	34	1.25078	7.16083	0	0	0	0	12.8	4	110	1.79	1.37	49	5.9	10.3	3.1	53	127	101	5.98057	73.4914	0.25
15	152.3	45	19.4	0	0	0	MMF	0	0	16	1.31579	5.06137	0	1	1	1	13.2	4.4	82	0.88	0.98	72	5.6	10.4	2.9	80	138	52	4.43675	73.5669	0.05
16	169	54.4	19	1	0	1	MMF	0	1	25	1.55885	6.42134	0	0	0	0	8.4	3.9	92	2.06	2.65	22	5.8	9.8	3.5	63	68	131	3.78581	74.1176	0.01
17	157.4	56.5	22.8	0	0	0	MMF	0	1	10	1.20192	5.7276	0	1	0	0	12.6	4	98	1.05	1.34	55	6	10.4	2.8	65	92	178	4.08326	74.1176	0.09
18	171.2	82.6	28.2	1	0	0	MMF	0	1	28	1.24301	8.3932	0	0	0	0	12	4.1	122	1	1.18	68	6.5	9.6	3.2	58	99	70	5.18882	74.053	0.02
19	148	45	20.5	0	0	0	EVR	0	1	15	1.34499	6.09478	0	1	0	0	11.7	3.3	88	1.32	2.11	31	6.2	9.3	3.5	55	84	238	3.49452	73.8872	0.08
20	156	44.9	18.5	0	1	0	MMF	0	1	22	1.46092	5.58432	0	0	1	0	9.9	3.9	89	1.61	1.61	35	6	9.7	2.8	95	87	60	4.54181	73.4694	0.01
21	163.5	59.5	22.3	1	0	0	MZR	0	1	32	1.62602	8.6188	0	0	0	0	11.2	3.6	103	1.68	1.8	35	5.6	8.8	2.3	67	103	106	5.12626	73.9583	3.65
22	169	92.7	32.5	0	1	1	MMF	1	1	29	1.40056	10.5949	0	0	0	0	10.3	3.6	150	1.91	2.02	32	8	9.2	3.1	40	96	85	4.0729	74.2574	2.28
23	156.4	47.1	19.3	1	0	1	AZ	0	0	15	1.06667	5.90737	0	1	0	0	9.9	3.2	81	0.64	0.77	101	6	8.5	3.5	47	116	75	4.46143	73.6264	0.47
24	156.3	47.3	19.4	1	0	0	MMF	0	1	25	1.65153	6.05002	0	0	0	0	12.5	4.2	102	0.89	0.83	81	6.3	9.9	2.7	84	89	78	4.59474	73.0978	0.005
25	171.5	85	28.9	0	0	1	MMF	1	1	16	0.879507	8.34686	0	1	0	0	13.7	3.7	114	0.96	1.03	78	5.2	9.3	3.1	56	120	80	4.35609	74.3833	0.11
26	158.5	57.7	23	1	0	0	MZR	0	1	25	1.30293	6.38876	0	1	1	1	12.3	3.7	134	1.25	1.41	50	6.4	10.1	2.8	66	97	54	4.77448	74.0838	0.16
27	154.2	52.5	22.1	0	0	0	EVR	0	1	16	1.27959	6.06032	0	1	0	0	12.7	3.6	84	0.76	0.92	86	5.5	9.4	2.9	70	95	90	4.58711	73.7143	0.01
28	157.5	48.3	19.5	0	0	0	MZR	0	1	16	1.09409	6.02268	0	1	0	0	12.1	3.9	99	1.29	1.37	47	5.4	9.2	3.2	75	115	77	5.35032	73.2095	0.94
29	180.5	72.1	22.1	0	0	0	MMF	0	1	30	1.42552	8.52971	0	0	0	0	11.8	3.7	91	1.56	1.36	52	5.4	9	2.5	46	120	167	5.50785	73.913	0.01
30	156.8	45	18.3	0	0	1	MMF	0	1	21	1.45773	5.76339	0	0	0	0	12.3	3.8	80	1.07	1.14	61	5.1	9.4	2.5	58	94	43	4.6775	73.4247	0.07
31	154.2	54	22.7	1	0	0	MZR	0	0	28	0.827472	6.98135	0	0	1	0	14.4	3.7	123	0.81	0.88	87	6.9	9.9	2.6	60	88	74	4.6253	73.9899	0.02
32	159.8	92	36	0	0	0	MMF	0	1	23	1.16891	8.05528	0	0	0	0	10.8	3.7	80	1.5	1.3	50	5.3	8.7	2.7	69	144	156	5.078	73.913	0.69
33	170.5	44.4	15.3	0	0	1	MMF	0	1	25	1.287	5.57959	0	1	1	1	10.8	4.4	103	2.45	2.16	29	5.2	9	2.7	101	81	96	4.36552	74.3243	0.09
34	153.4	81	34.4	0	0	0	MMF	0	1	23	1.28041	8.00627	0	0	0	0	13.8	4.6	109	0.72	1.05	77	6	10.7	2.6	61	118	135	4.29495	74.6988	0.03
35	161	66	25.5	0	0	1	MMF	1	1	31	1.11235	8.12469	0	0	0	0	12.1	3.8	162	1.61	1.72	39	6.1	9.2	3.4	62	57	172	4.96584	74.4635	0.05
36	161.4	50.5	19.4	0	0	1	MMF	0	1	23	1.34138	5.55855	0	0	1	0	12.2	4.3	95	1.63	1.6	36	5.7	9.3	3.2	66	111	98	5.17196	73.5376	0.26
37	159	48.7	19.3	0	0	1	MMF	0	0	22	1.3468	5.55753	0	0	1	0	15.6	4.3	95	0.93	1.15	62	5.7	9.5	4.2	74	102	133	4.81671	73.2938	0.01
38	168.4	53	18.7	1	0	1	MMF	0	1	40	1.24922	7.69433	0	0	0	0	13.3	4.4	86	1.36	1.36	57	5.2	11.1	2	66	92	93	6.44864	74.4035	0.12
39	168	58	20.5	0	0	0	EVR	0	1	31	1.21877	6.93736	0	0	1	0	12.2	3.6	100	1.3	1.67	47	5.4	10.9	2.2	116	92	124	4.263	73.8636	0.13
40	157.9	41.3	16.6	1	0	0	MZR	1	1	14	1.27146	5.30635	0	1	1	1	10.7	4.4	127	1.6	2.17	29	5.8	9.4	4.6	86	116	59	4.71068	73.6232	0.005
41	164	60.6	22.5	0	1	1	EVR	0	1	32	1.1383	7.21297	0	0	0	0	14	3.7	87	1.23	1.35	55	5.8	8.8	3.2	70	85	59	4.34141	74.3056	0.02
42	151.2	49.5	21.7	1	0	1	MZR	0	1	19	1.24456	6.12822	0	0	0	0	12.7	4.3	94	1.27	1.41	44	6	7.1	4.5	88	82	102	4.49937	73.8028	0.05
43	158.5	61.6	24.5	1	0	0	MMF	0	1	40	1.35135	8.30738	0	0	0	0	14.1	3.8	88	2.15	2.13	27	5.4	9.6	3.4	63	107	109	5.7049	74.2678	0.02
44	158.5	40	15.9	0	0	1	MMF	1	1	15	1.06213	5.6444	0	1	1	1	10.4	3.7	100	1.12	1.34	56	5	10.2	2.4	60	106	57	3.7698	74.0634	0.4
45	159.2	61	24.1	0	0	0	MMF	0	1	29	1.27307	6.99951	0	0	1	0	10.7	4	74	2.49	2.59	25	5.6	8.9	2.5	51	124	182	5.39536	73.9953	0.04
46	175.5	76	24.7	1	0	1	EVR	0	1	32	1.35685	8.07461	0	0	0	0	12.5	3.6	103	1.44	1.55	50	6.4	8.9	2.5	71	149	91	5.21979	74.122	0.36
47	178.9	71	22.2	0	0	0	AZ	1	1	40	1.30634	8.21741	0	0	0	0	13.2	3.8	116	1.7	1.08	53	6.6	9.7	3.2	79	92	82	4.53515	73.9602	0.02
48	151.6	41.2	17.9	0	0	1	AZ	0	0	23	1.3459	5.49112	0	0	1	0	13.4	4.1	95	0.94	1.26	61	5.6	9.6	4	66	72	73	4.89823	73.955	0.13
49	155.8	43.1	17.8	0	0	0	MMF	0	0	20	1.37363	5.1661	0	0	1	0	11.3	4.1	90	1.43	1.3	49	5.3	9.3	2.6	79	72	13.8	4.18595	73.5099	0.01
50	151	56.4	24.7	0	0	1	MMF	0	1	15	1.19689	7.7058	0	1	0	0	11.6	3.8	90	1.23	1.87	35	5.7	9.2	4.1	60	122	93	4.3535	74	0.01
51	165.8	62	22.6	0	0	1	MMF	0	1	31	1.57729	8.05031	0	0	0	0	13	3.7	110	0.93	0.88	88	6.4	9.6	2.3	79	74	79	4.09894	74.3487	0.02
52	162.5	82.8	31.4	0	1	0	EVR	1	1	25	1.34228	7.14982	0	0	0	0	12.6	3.7	115	1.62	1.76	37	8.4	9.5	3.6	68	108	169	5.02222	74.0047	0.81
53	152	52	22.5	0	0	0	MMF	1	1	11	0.997009	7.03774	0	1	0	0	12.1	3.7	123	1.12	1.72	47	5.4	9	3.6	45	71	105	2.47883	73.9362	0.48
54	155.5	62.8	26	0	0	1	MZR	0	1	16	1.08873	6.07934	0	1	0	0	14.9	3.7	115	0.91	1.06	70	6.4	9.8	3.1	70	116	123	4.88771	73.6264	0.52
55	171.3	67.3	22.9	0	0	0	EVR	0	1	33	1.7316	8.56061	0	0	0	0	15.5	3.5	93	1.28	1.28	62	6.2	9.2	2.8	32	114	228	5.42169	73.1107	0.41
56	157	57.5	23.3	0	0	0	MMF	0	0	15	1.4771	6.53171	0	1	0	0	13.3	3.7	88	0.81	1.02	78	5.6	8.9	3	69	146	129	3.96947	74.2188	0.01
57	135	45.1	24.7	0	0	0	MMF	0	1	13	0.942507	5.3882	0	1	1	1	13	4	103	0.81	1.07	71	6.1	9.7	3.5	111	88	167	4.59554	73.8007	0.06
58	149.5	66	29.5	0	1	0	EVR	0	1	27	1.87266	9.08267	0	0	0	0	10.3	3.5	93	1.63	1.72	46	5.9	10.7	2	38	93	86	4.84963	74.8268	0.22
59	169	79.3	27.8	0	0	0	EVR	1	1	34	1.16686	9.83509	0	0	0	0	13.1	3.7	130	1.77	1.91	35	6.6	9.2	3	80	126	102	4.03611	74.7795	0.03
60	162	50.1	19.1	0	0	1	MMF	0	1	30	1.44196	6.20332	0	0	0	0	10.8	4.3	90	0.92	0.91	82	5.7	8.9	3.3	59	84	41	5.58045	73.4015	0.01
61	158	51.9	20.8	0	0	1	MMF	0	1	20	1.41945	6.86188	0	0	0	0	13.1	3.8	101	0.96	1.43	51	6.5	9.6	3	76	104	163	3.89388	74.359	0.25
62	155	52.4	21.8	0	0	0	MMF	0	1	20	1.30208	5.55255	0	0	1	0	11.1	3.8	88	1.56	1.97	34	5	8.7	4	51	140	132	4.50026	73.6196	0.12
63	171.2	95	32.4	0	0	1	MMF	1	1	34	1.28123	7.762	0	0	0	0	14.1	4	102	1.07	1.16	66	6.1	9.2	3	81	76	108	4.51774	74.5763	0.04
64	153.3	33.4	14.2	0	0	1	MMF	0	0	17	1.24922	4.50621	0	1	1	1	12	4	100	0.77	0.79	89	5.6	8.9	2.8	117	135	57	4.28826	73.6842	0.005
65	156	86.7	35.6	1	0	1	MMF	0	1	24	1.34228	7.50329	0	0	0	0	10.8	4	169	1.91	1.63	35	7.5	9.1	3.2	64	123	93	5.91406	73.6961	0.16
66	158.9	42	16.6	1	0	0	MMF	0	0	13	0.978474	4.95461	0	1	1	1	12.5	3.9	87	1.69	2.05	41	5.5	9.5	3.1	36	65	151	4.25321	73.4328	0.16
67	158.6	59.3	23.6	1	0	1	MMF	1	1	27	1.25865	7.144	0	0	0	0	12.7	3.9	149	0.89	1.05	69	7.8	9.7	3.1	57	85	106	3.85546	73.9336	0.54
68	159.9	54.2	21.2	0	1	0	MMF	0	1	23	1.76367	5.43648	0	0	1	0	11.9	4.1	86	1.19	1.01	64	6.1	9.5	2.6	102	76	93	4.5509	73.4286	0.01
69	160.2	64	24.9	0	0	1	MMF	0	1	32	1.45243	7.17736	0	0	0	0	12	3.9	97	1.01	1.19	65	5.8	9.4	3.2	98	67	117	4.63001	74.4578	0.04
70	177.5	69	21.9	0	0	1	MMF	0	0	33	1.52672	6.77326	0	0	1	0	13.9	4.1	103	1.39	1.33	58	5.3	8.1	3.3	40	132	198	4.91963	73.7288	0.06
71	168.5	53	18.7	0	1	0	EVR	0	1	31	1.35501	6.92442	0	0	1	0	11.4	3.3	93	1.22	1.22	59	5.4	9	3.5	108	82	91	4.15901	74.1228	0.01
72	158.2	46.2	18.5	0	0	0	MMF	1	0	25	1.45138	5.60989	0	0	1	0	13.3	3.8	132	1.15	1.26	54	6.4	9.9	4.1	86	119	117	4.23269	73.9394	0.13
73	177	63.3	20.2	0	0	1	MMF	0	1	42	1.30208	7.01267	0	0	0	0	11.7	4.4	97	1.43	1.29	56	5.2	9.2	2.5	53	104	139	5.1297	73.7374	0.02
74	158	52.5	21	0	0	1	AZ	0	1	22	1.45138	5.92053	0	0	0	0	12.6	3.8	84	1.04	0.96	71	5	9.5	2.7	81	129	147	5.03963	73.9255	0.11
75	168	64	22.7	0	0	0	MMF	0	1	34	1.38504	7.98965	0	0	0	0	15.8	3.8	123	1.08	1.06	78	5.2	9.6	2.5	99	53	212	6.54115	73.7044	0.02
76	175.5	71	23.1	0	0	0	MMF	1	1	38	1.58983	7.7337	0	0	0	0	13.9	4	127	1.24	1.34	57	5.3	9.2	3.1	46	104	45	4.40748	74.3738	0.05
77	168.4	72.3	25.5	0	0	0	MMF	1	1	31	1.44613	10.1733	0	0	0	0	12	4.2	74	1.08	1.35	58	6	9.6	3.5	56	82	68	4.3868	74.0741	0.18
78	158.5	47.5	18.9	1	0	1	AZ	0	0	19	1.13701	4.91198	0	0	1	0	10.5	4	81	0.68	0.96	96	5.5	9.2	3.2	78	101	222	4.66038	73.7013	0.19
79	165.4	66.3	24.2	1	0	1	MZR	0	1	24	1.37836	7.66892	0	1	0	0	11.7	3.8	88	1.45	1.53	70	5.6	8.1	3	74	94	104	4.77389	73.9421	0.24
80	153	59	25.2	0	0	1	MMF	0	0	30	1.39082	7.08702	0	0	0	0	15	3.7	105	1.55	1.52	45	5.5	9.3	2.4	80	76	69	5.74651	74.0458	0.05
81	164.8	56.4	20.8	0	0	1	MMF	0	1	30	1.34228	7.02897	0	0	0	0	11.6	4	99	1.59	1.95	37	5.2	9.6	2.6	100	96	80	4.8794	73.7443	0.01
82	153.8	53.5	22.6	0	0	1	MMF	0	1	22	1.2837	6.05806	0	0	0	0	11.8	4.1	91	0.79	1.04	77	5.7	10.1	3.4	75	97	161	4.90611	73.9726	0.03
83	153	50	21.4	0	0	1	MMF	0	0	14	1.1534	5.4039	0	1	1	1	12.9	3.9	111	1.15	1.12	54	6.1	10.4	2	65	75	110	4.06072	73.955	0.02
84	165.2	70.5	25.8	1	0	0	MMF	0	1	25	1.22549	8.38004	0	1	0	0	12.6	3.6	99	1.27	2	42	4.9	10.7	3	78	114	86	4.35165	73.4767	0.22
85	163	66	24.8	0	0	1	MMF	0	1	24	1.44928	7.78351	0	1	0	0	11.3	3.9	96	1	1.04	70	5.5	10.1	2.7	76	144	69	4.0152	73.4151	0.08
86	150	39.8	17.7	0	1	0	MMF	0	1	14	1.53728	5.21778	0	1	1	1	11.2	4.3	80	0.95	1.56	47	5.6	9.9	3.8	67	71	91	3.13232	73.7654	0.01
87	167.5	86	30.7	0	0	0	MMF	0	1	34	1.24224	10.5574	0	0	0	0	14.5	4	94	0.87	1.08	78	5.7	10.5	2.4	56	109	172	4.78284	74.5514	0.005
88	153.1	49.8	21.2	0	1	1	MMF	0	1	22	1.57853	5.69122	0	0	1	0	12.9	4	102	0.89	0.94	74	5.8	9.5	3.2	73	126	63	4.39981	73.913	0.31
89	170	66	22.8	0	0	0	MMF	0	1	45	1.55642	7.0346	0	0	0	0	14.4	3.7	98	1.02			6	9.3	3	70	94	54	5.40489	73.9583	0.01
90	167.3	91	32.5	0	0	0	MMF	0	1	35	1.28205	9.27498	0	0	0	0	15.7	4	92	1.23	1.46	52	5.5	8.3	4.1	53	58	115	4.64304	74.5826	0.03
91	159.9	44.9	17.6	0	0	1	MMF	0	1	17	1.3947	5.47559	0	1	1	1	14.5	4	75	1.08	1.26	58	5.3	9.4	2.6	85	87	71	3.98582	73.9884	0.16
92	157.5	59.7	24.1	0	0	0	MMF	1	1	34	1.38122	7.88108	0	0	0	0	11.9	3.8	134	1.31	1.52	46	8.1	9.2	3.4	47	145	132	4.84005	74.6606	0.18
93	159.2	47	18.5	0	0	0	MMF	0	1	14	1.08992	6.06045	0	1	0	0	11.4	3.7	94	0.81	1.36	60	5.3	9.9	3	72	110	128	3.33757	73.9018	0.19
94	165	57	20.9	0	0	1	MMF	1	0	35	1.49031	7.2213	0	0	0	0	13.8	4.4	105	1.68	1.59	42	6	10.3	2.2	71	133	129	4.82319	74.1573	0.06
95	149.5	48.7	21.8	0	0	1	MMF	0	1	18	0.965251	7.00663	0	1	0	0	12.7	3.9	94	1.18	1.43	51	5.6	9	3.6	57	86	159	4.8931	74.4382	0.02
96	168.4	65.1	23	0	0	1	MMF	0	1	26	0.963855	9.19652	0	0	0	0	10.5	3.8	133	1.38	1.64	45	7.3	9.4	3.4	54	113	64	3.00138	74.7681	0.03
97	156.7	46.5	18.9	0	1	0	MMF	0	1	19	1.45773	6.52823	0	0	0	0	10.7	4	97	0.96	1.23	57	4.9	10	3.2	64	103	155	4.38181	73.3333	0.005
98	158.4	60	23.9	0	0	0	MMF	0	1	20	1.32979	5.94247	0	0	0	0	10.7	3.7	90	1.08	1.25	58	5.5	9.3	2.5	70	109	223	5.06051	73.6	0.13
99	165.7	76	27.7	0	0	0	MMF	1	1	38	1.43266	8.71561	0	0	0	0	14	3.6	247	1.29	1.45	53	8	9.1	3	62	78	72	5.11273	74.5968	0.08
100	174.2	67	22.1	0	1	1	MMF	0	1	35	1.13186	7.8232	0	0	0	0	15.1	3.8	98	1.11	1.18	70	5.5	9	2.3	78	105	85	6.08556	73.6842	0.03
101	171	86	29.4	0	0	1	MMF	1	1	33	1.31148	8.55306	0	0	0	0	16.1	4	108	1.53	1.59	47	6.7	9.5	2.9	46	113	348	5.66866	73.8657	0.15
102	169.4	105	36.6	0	0	1	MMF	1	1	18	1.25707	8.87221	0	0	0	0	11.1	3.5	104	1.35	1.54	43	7	8.8	4.6	43	73	319	4.98339	73.7828	0.3
103	183.5	67.9	20.2	0	0	0	MMF	0	1	46	1.21433	7.92344	0	0	0	0	12.4	3.8	100	1.3	1.13	69	5.2	9	3.9	85	118	72	5.26258	74.0283	0.07
104	162.8	59.2	22.3	0	1	1	EVR	0	1	35	1.73913	9.00624	0	0	0	0	13.8	3.2	90	1.57	1.86	38	5.9	9.2	2.9	58	98	191	5.50634	73.913	0.02
105	167.1	64.3	23	0	0	1	MMF	0	1	36	1.35962	7.51726	0	0	0	0	13.5	4.3	102	1.47	1.37	58	4.9	9.6	3.4	53	136	35	5.9245	73.428	0.08
106	158.7	57	22.6	0	0	1	MMF	0	1	20	1.37931	6.85707	0	0	0	0	11.9	3.7	102	1.53	1.55	40	5.2	9.3	2.8	78	94	62	5.22621	72.9529	0.02
107	160.8	49	19	0	0	0	MMF	0	1	12	1.08992	6.11062	0	1	0	0	12.3	4	103	0.77	1.02	73	5.6	10.6	2.5	78	108	91	3.90207	74.7283	0.01
108	158.4	59.3	23.6	0	0	0	EVR	1	1	22	1.53965	6.7077	0	0	0	0	10.8	3.9	136	0.74	0.96	82	7.3	9.2	3.5	63	68	107	4.59853	74.2268	0.33
109	159.8	48	18.8	0	0	0	MMF	0	1	35	1.58353	5.69783	0	0	1	0	11.4	4	87	1.14	1.25	57	5.5	9.7	3.5	63	96	111	5.04869	73.5795	0.05
110	178.5	63	19.8	0	0	1	MMF	0	1	32	1.1274	9.177	0	0	0	0	12.9	3.9	88	1.63	1.69	37	5.6	8.9	3.1	104	57	41	4.08466	74.6141	0.01
111	172.1	63	21.3	0	0	1	MMF	0	1	32	1.52091	7.13745	0	0	0	0	14.8	4	93	0.99	0.86	91	5.7	9.4	2.7	107	102	39	5.17296	73.8947	0.005
112	159.3	61	24	0	1	0	EVR	0	1	22	1.35685	7.33356	0	0	0	0	10.7	3.4	87	1.16	1.3	52	5.7	8.9	3.1	63	128	71	4.52006	73.7079	0.06
113	168	58	20.5	0	0	0	MMF	1	0	20	1.20482	6.62202	0	1	1	1	13.9	3.8	96	1.13	1.51	53	6.8	9.1	2.4	74	82	88	3.64091	74.359	0.01
114	159	53	21	0	0	0	EVR	1	1	33	1.2945	7.68957	0	0	0	0	13.5	3.7	105	1.77	1.89	35	7.2	9.2	3.3	57	166	180	4.06191	74.8879	0.01
115	161.8	57	21.8	0	1	1	MMF	0	1	28	1.28866	6.19957	0	0	1	0	13	4	123	1.36	1.25	51	6.2	9.2	2.5	58	74	83	4.53244	74.2782	0.02
116	157	46	18.7	0	0	0	EVR	0	1	17	1.35685	5.61078	0	1	1	1	14.5	4	112	1.24	1.55	40	6.5	10	3.8	97	102	104	3.55249	73.4286	0.03
117	170.6	52.8	18.1	0	0	0	EVR	0	0	22	1.28287	6.53854	0	0	0	0	11.6	4.2	78	1.45	1.79	40	5.3	8.2	3.4	89	97	97	3.4528	73.8739	0.02
118	170.5	50	17.2	1	0	1	MMF	0	1	29	0.961538	6.72165	0	0	1	0	12.2	4.7	105	1.95	1.72	37	5.2	10.1	3.9	95	166	64	4.49478	74.0319	0.06
119	173.7	77	25.5	0	0	1	MMF	1	1	31	1.6247	7.94785	0	0	0	0	16	3.9	133	0.97	0.94	87	8	9.6	1.8	88	96	87	4.36453	74.3137	0.44
120	157.4	66.6	26.9	0	0	1	MZR	0	1	35	1.16754	8.75891	0	0	0	0	11.1	4.1	141	1.36	1.5	44	6.8	11.1	2.6	37	60	1271	5.92512	73.8095	0.19
121	170	61.5	21.3	0	1	0	EVR	0	1	42	1.24378	8.28028	0	0	0	0	12	3.7	85	1.43	1.55	53	5.4	9.2	2.2	81	97	179	5.9801	73.4733	0.03
122	161.8	56	21.4	1	0	0	MMF	0	1	10	1.20846	5.51582	0	1	1	1	12.4	4.2	90	1.11	1.48	50	5.6	9.4	3.2	61	107	89	3.76165	73.6695	0.01
123	155.1	44.5	18.5	0	1	1	MMF	0	1	17	1.25786	5.56202	0	1	1	1	11.1	4.1	82	1.34	1.48	44	5.3	10.3	3.6	93	106	77	4.44203	73.6994	0.01
124	172	75	25.4	0	0	0	MMF	0	1	35	1.45879	7.50744	0	0	0	0	13.8	3.7	99	1.31	1.48	53	6.1	10.5	1.9	36	105	166	5.07972	73.9382	0.25
125	166.6	60.2	21.7	0	0	1	EVR	0	1	20	1.38026	6.61849	0	0	0	0	16.3	4	94	0.76	1.09	74	5.5	9.4	3.3	74	70	201	3.83266	74.0476	0.01
126	172	80.3	27.1	0	1	1	MMF	0	1	27	1.44509	8.8629	0	0	0	0	13.2	3.9	107	1.32	1.28	54	6.4	8.9	3	67	69	110	4.48341	73.8819	0.06
127	157	42.8	17.4	0	0	1	MMF	0	1	16	1.35135	5.94345	0	1	0	0	13.9	3.9	91	0.72	0.96	85	6.3	8.9	3.5	61	126	160	4.37144	74.1047	0.01
128	175.9	79.2	25.6	0	0	0	MMF	0	1	40	1.20048	8.37405	0	0	0	0	13.3	4.1	83	1.55	1.33	55	5.5	9.3	2.9	50	132	69	5.84489	73.5652	0.05
129	154.6	54	22.6	0	1	0	EVR	0	1	18	1.25945	6.96619	0	0	0	0	11.6	3.5	101	0.76	1.24	67	6.1	9.5	2.7	113	95	101	4.52243	74.1855	0.17
130	171	56.2	19.2	0	0	0	MMF	0	0	31	1.41945	7.73229	0	0	0	0	13.4	4.5	91	2.1	1.58	41	5.4	9.4	3.6	79	121	72	6.34432	73.4653	0.005
131	164.9	63	23.2	0	1	0	MMF	0	1	36	1.28866	8.32965	0	0	0	0	14.3	3.7	116	1.08	1	74	5.6	8.9	2.9	58	119	68	5.37557	73.9754	0.01
132	171.4	71.1	24.2	0	0	1	MMF	0	1	50	1.3708	8.24768	0	0	0	0	12.1	4.7	117	1.69	1.34	55	5.6	9.6	3	52	100	87	7.04804	73.3706	0.01
133	154	35	14.8	0	1	1	MMF	0	1	19	1.35777	4.43582	0	0	1	0	8.6	3.7	86	2.35	2.86	21	5.1	8.5	3.5	73	71	138	4.2866	73.2203	0.01
134	151.5	47.1	20.5	0	0	1	MMF	0	1	22	1.30208	5.47659	0	0	1	0	10	3.8	89	0.75	0.9	92	5	9	3.6	68	146	119	4.68058	73.6025	0.01
135	174	82.3	27.2	0	0	1	MMF	1	1	29	1.17647	7.44484	0	0	0	0	15.9	4.9	166	1.13	1.2	73	6.5	10.4	2.5	59	160	228	5.30777	73.8791	0.15
136	171.3	62	21.1	0	1	1	EVR	0	1	32	1.66667	6.99299	0	0	1	0	16.8	3.8	84	1.06	1.25	74	5.4	9.6	3.7	48	126	178	5.20363	73.6952	0.03
137	162.8	55.5	20.9	0	0	1	MMF	0	1	24	1.40154	5.50109	0	0	1	0	12.6	3.9	91	1.26	1.32	49	5.8	8.7	2.5	91	120	100	4.20066	73.9884	0.06
138	160.3	60.7	23.6	0	1	0	EVR	0	0	30	1.22474	7.37077	0	0	0	0	11.4	3.5	92	1.32	1.43	53	5.7	9.5	2.7	70	158	165	4.97924	74.2152	0.06
139	166	55.4	20.1	0	0	1	MMF	1	1	29	1.04657	6.52127	0	0	1	0	14.7	4	115	0.99	1.41	59	6.6	9.7	2.8	54	138	179	3.77839	74.5098	0.01
140	168	76.6	27.1	0	0	1	MMF	0	1	53	1.64474	8.51403	0	0	0	0	14.1	4.1	93	1.56	1.19	59	5.4	9.3	3.7	70	106	108	7.07058	73.578	0.17
141	164.9	61	22.4	0	0	1	MMF	0	1	25	1.5186	7.8957	0	0	0	0	10.5	3.5	91	1.94	3.03	22	5.6	9.3	3.1	57	95	125	4.42947	73.7634	1.32
142	166.6	51.2	18.4	0	0	1	EVR	0	1	37	1.27389	7.14091	0	0	0	0	11.7	4.3	89	2	1.53	45	6.2	9.5	2.9	69	131	72	6.25491	73.7634	0.01
143	166	58.8	21.3	0	1	0	EVR	1	1	40	1.40449	7.42488	0	0	0	0	10.2	3.7	88	1.03	1.11	71	7	9.2	3.8	72	98	51	4.73412	74.2739	0.04
144	170.3	67	23.1	0	0	1	MMF	0	1	24	1.24611	7.32016	0	1	0	0	16.4	3.5	102	0.65	0.95	93	6.3	10.2	2.2	79	107	108	4.3	74.4828	5.21
145	160	48.6	19	0	1	1	MMF	0	1	25	1.19546	6.09766	0	1	1	1	12.9	4.1	93	0.77	0.79	118	5.2	10.1	2	49	105	77	5.7375	73.6292	1.37
146	158.6	60.8	24.2	0	0	0	EVR	1	1	24	0.987654	6.47612	0	0	0	0	13.8	3.7	148	0.85	1.23	62	7.1	10.6	2	67	167	125	3.41826	74.1425	0.03
147	160	57.2	22.3	0	0	1	MMF	0	1	30	1.42349	6.75	0	0	0	0	14	4	88	0.8	0.95	79	5.7	9.4	3.4	85	135	52	4.71718	73.8717	0.04
148	150.8	56.6	24.9	0	0	0	MMF	1	1	20	1.32626	7.3129	0	0	0	0	10.7	3.8	97	0.6	0.83	96	7.2	9.2	3.6	62	109	115	4.70551	73.8667	0.31
149	170	57	19.7	0	0	1	MMF	0	0	30	1.68209	7.23875	0	0	0	0	12.7	3.8	102	1.35	1.51	46	6.3	9	2.8	105	70	32	4.62218	74.0659	0.01
150	167	47.5	17	1	0	1	EVR	0	1	25	1.5528	5.38205	0	0	1	0	13.9	3.8	86	0.96	0.96	80	5.9	9.3	3.3	79	69	116	4.53615	73.9645	0.25
151	184.5	115	33.8	0	0	0	MZR	0	1	60	1.14155	10.5522	0	0	0	0	12.3	3.6	89	1.8	1.86	40	5.6	9.1	2.9	50	133	173	5.42817	73.9541	0.68
152	153.4	90	38.2	0	0	0	EVR	0	1	15	1.38122	7.43682	0	1	0	0	12.9	3.6	104	1.68	2.18	28	5.8	9.7	3.4	63	137	196	4.89937	74.2169	1.93
153	156	46.4	19.1	0	0	1	MMF	0	1	15	1.48038	4.7666	0	1	1	1	14.1	3.9	92	0.78	1.11	73	5.9	9.2	3	91	111	116	3.92677	73.5786	0.02
154	159.2	66.4	26.2	0	0	1	MMF	1	0	12	0.512689	7.48482	1	1	0	0	9.5	3.9	144	1.84	2.69	25	6.4	8.8	3.2	50	118	104	3.79617	74.8166	0.06
155	157.6	51	20.5	0	0	0	MMF	0	1	24	1.04822	6.37739	0	1	1	1	15.4	4.3	101	1.05	1.19	67	5.7	10.9	2.8	54	114	111	4.95096	74.5257	0.08
156	161.6	60.4	23.1	1	0	0	MMF	0	1	22	1.45773	6.34512	0	0	0	0	11.2	3.7	93	1.11	1.41	50	6	9.3	3	64	93	107	4.65021	73.7789	0.03
157	169.5	67.3	23.4	0	0	1	MMF	0	1	44	1.53022	8.05771	0	0	0	0	14.6	4.4	92	1.53	1.28	55	5.4	9.5	3.2	78	78	97	5.98829	73.9526	0.01
158	174.3	66	21.7	0	1	0	EVR	0	0	27	1.49142	7.37974	0	0	0	0	11.5	3.7	91	2.02	2.5	27	5.5	7.3	4.7	54	156	178	4.19588	74.4467	0.56
159	154.7	48.4	20.2	0	0	1	MMF	0	1	29	1.23993	5.96271	0	0	0	0	11.3	3.9	88	1.09	1.09	63	5.6	9.4	2.2	84	85	61	5.36323	73.6842	0.01
160	169.2	67	23.4	0	1	0	MMF	0	1	29	1.0543	8.10028	0	0	0	0	13.8	3.7	85	1.02	1.31	71	5.6	9.6	2.7	88	69	222	4.43883	74.4422	0.43
161	173.3	70.5	23.5	1	0	1	EVR	1	1	31	1.3245	7.81477	0	0	0	0	13.3	4	115	1.84	1.74	36	6.3	10	2.7	70	82	125	4.84103	74.0385	0.01
162	169	69	24.2	0	0	0	EVR	0	1	32	1.54799	8.10546	0	0	0	0	12.7	4	88	1.73	1.49	49	5.6	9.3	3.3	48	80	97	6.48416	72.6397	0.1
163	156.7	46	18.7	0	0	0	MMF	1	0	21	1.74216	5.68929	0	0	1	0	11.2	3.7	101	0.93	1	74	4.3	10.3	3.3	91	73	66	4.2649	73.5795	0.03
164	155.2	62	25.7	0	0	1	MMF	0	0	31	1.28041	8.08318	0	0	0	0	10.6	4.2	96	1.67	1.42	40	5.5	9.7	2.8	71	126	92	5.50241	73.3925	0.04
165	165.4	51.6	18.9	0	1	0	MMF	0	1	25	1.38985	6.00209	0	0	0	0	14.7	4.1	82	0.84	1.08	71	5.5	9.9	3.1	110	105	105	4.51804	73.6148	0.01
166	150.5	38.4	17	1	0	0	EVR	0	0	17	0.934579	5.01098	0	1	1	1	13.7	4	85	1.18	1.24	59	6.1	9.3	3.3	81	79	110	4.88429	73.5786	0.005
167	166.7	112.4	40.4	0	1	0	MMF	0	1	31	1.36612	11.3894	0	0	0	0	13.9	4.3	97	1.44	1.38	56	5.5	9.5	3.3	56	135	154	5.86989	74.028	0.1
168	186	100	28.9	0	0	1	MMF	1	1	46	1.42248	8.99815	0	0	0	0	17.1	3.9	148	1.19	1.27	65	7.1	9.2	2.8	55	156	70	5.54212	73.4783	0.38
169	145.8	47.8	22.5	1	1	1	MMF	0	1	14	0.947418	4.46428	0	1	1	1	13.5	3.9	100	0.81	1.04	72	5.8	9.2	2.2	60	72	119	3.99138	73.4317	0.005
170	162.5	69.8	26.4	0	0	0	MMF	0	1	34	1.79372	8.69112	0	0	0	0	12.7	4.2	86	1.43	1.29	56	6.3	10.2	3.4	43	96	231	7.42227	72.8324	0.15
171	151.5	41.9	18.3	0	0	0	MMF	1	1	17	1.15141	5.28053	0	1	1	1	10.9	3.4	89	1.35	1.62	43	7	9	3.2	82	102	61	3.62062	73.494	0.04
172	156	46.6	19.1	0	1	1	EVR	0	1	22	1.49813	5.66239	0	0	1	0	11.3	3.9	128	0.85	1.1	64	7	9.7	3.1	52	62	195	4.39632	73.4513	0.05
173	165.2	55.5	20.3	0	0	0	EVR	0	1	36	1.40449	7.61788	0	0	0	0	10.5	3.6	101	2.62	2.88	21	5.6	11	2.8	57	119	169	4.50382	73.8197	0.4
174	179.8	68.4	21.2	0	1	0	MMF	0	1	56	1.57604	8.25908	0	0	0	0	13.5	4.2	108	1.69	1.3	51	5.5	9.9	2.4	84	61	88	5.59255	73.854	0.01
175	170.1	88	30.4	0	0	1	MMF	1	1	35	1.37457	9.5424	0	0	0	0	12.8	4.3	238	1.5	1.29	56	7.3	9	3	63	146	125	5.91703	74.2809	0.09
176	170	62.9	21.8	1	0	0	EVR	0	1	47	1.19689	7.53633	0	0	0	0	11.9	4.2	93	1.74	1.45	51	5.8	9.7	2.5	57	145	180	6.07882	73.7673	0.06
177	180	96.2	29.7	0	0	1	MMF	0	1	52	1.24146	8.87037	0	0	0	0	12.8	4.3	94	1.29	1.15	72	5.2	9.1	3.6	38	113	249	6.51537	73.5849	0.07
178	167.3	93.8	33.5	0	1	1	MMF	1	1	29	1.15674	10.6183	0	0	0	0	13.3	4	171	1.38	1.48	49	8.1	9.5	3.1	43	158	151	4.26534	74.7126	0.08
179	166	51	18.5	0	0	0	MMF	0	1	29	1.33422	7.55552	0	0	0	0	12.4	3.8	91	1.21	1.2	65	5.3	9.2	3.2	125	79	74	4.82486	74.3041	0.01
180	148	39.7	18.1	0	0	1	MMF	0	1	25	1.41044	5.48302	0	0	1	0	12.7	4.2	92	2.29	2.67	22	5.4	9.7	4.2	51	109	76	5.73422	73.3333	0.11
181	157.2	54.8	22.2	0	1	1	EVR	0	1	23	1.39082	8.78526	0	1	0	0	12.7	3.8	100	1.14	1.43	54	5.8	9.1	3.3	106	76	92	4.58419	74.1794	0.01
182	168	58	20.5	0	0	1	MMF	0	1	35	1.49477	7.12514	0	0	0	0	15.5	4.4	91	1.16	1.08	80	5.4	9.4	3.6	46	133	173	6.43699	73.6402	0.04
183	150.7	57	25.1	0	1	0	MMF	1	1	15	0.965717	6.83385	0	1	0	0	11.9	3.6	84	1.17	1.5	43	6.8	9	3.9	53	84	152	4.01695	74.1848	0.38
184	172.5	69	23.2	0	1	1	EVR	0	1	35	1.37646	8.61332	0	0	0	0	11.2	4.2	89	2.1	2.08	34	5.9	9.2	3.5	49	149	166	6.17952	73.2975	0.1
185	171.4	63	21.4	0	0	1	EVR	0	1	34	1.54679	6.93717	0	0	1	0	11.9	4	111	1.53	1.74	40	6.3	9.4	3	44	122	139	4.79295	74.1866	0.02
186	169.2	57.2	20	0	1	1	MMF	0	1	41	1.59236	7.4925	0	0	0	0	15.2	4.1	102	1.15	0.96	78	5.3	9.4	3.2	66	158	122	6.56632	73.6419	0.07
187	174.5	89.5	29.4	0	1	1	MMF	1	1	38	1.46092	8.96873	0	0	0	0	16.3	4.4	145	1.14	0.97	78	8.7	10	3	67	148	71	4.8475	74.4792	0.08
188	163.2	67	25.2	0	0	1	EVR	0	1	33	1.42045	8.52662	0	0	0	0	11.8	3.5	90	1.52	1.55	43	5.7	9.1	2.8	78	137	77	4.65108	74.0812	0.03
189	163.6	54.5	20.4	0	0	1	MMF	0	1	19	1.39276	6.10126	0	0	0	0	13.2	3.7	86	1.18	1.12	55	5.4	8.9	3.4	93	129	60	4.66465	73.2843	0.46
190	165.6	81	29.5	0	1	1	MMF	1	1	21	1.27065	6.92111	0	0	0	0	9.5	3.9	148	1.12	1.06	57	7.4	8.8	3.2	44	89	137	3.92921	74.4186	0.19
191	152.8	88.3	37.8	0	1	0	MMF	0	1	21	1.3468	8.12923	0	0	0	0	9	3.9	99	2.19	2.64	23	5.8	9.2	3.5	40	87	141	5.11503	74.2291	0.09
192	153.2	44	18.7	1	0	1	MMF	0	1	14	1.16009	4.772	0	1	1	1	12	4.5	90	1.31	1.71	40	5.8	11.5	2.8	53	129	123	4.25192	73.6842	0.06
193	158	43	17.2	0	1	0	MMF	0	1	17	1.36147	5.2756	0	1	1	1	11.6	4.1	102	0.94	0.86	86	5.6	9	3.3	81	96	73	5.28586	73.3533	0.02
194	151.2	45.1	19.7	0	0	0	MMF	0	1	23	0.903342	5.00406	0	0	1	0	14.6	3.8	89	0.76	0.93	93	5.5	9.8	2.9	75	144	96	4.77189	73.6667	0.07
195	168.4	75	26.4	0	0	0	EVR	0	1	31	1.3132	8.02227	0	0	0	0	10.3	4.2	94	2.65	2.18	28	5.9	9.6	2.9	81	144	201	5.68506	73.8636	0.12
196	163.4	75	28.1	0	0	0	EVR	0	1	19	1.15808	6.88026	0	0	0	0	11.5	3.5	109	1.2	1.82	36	5.9	9.2	2.3	47	105	288	3.51051	74.3405	0.08
197	176.8	71	22.7	0	0	0	EVR	1	1	32	1.65563	7.9723	0	0	0	0	13.6	3.5	114	1.77	1.67	40	6.8	8.9	2.1	46	75	179	5.6385	74.1758	0.31
198	164.1	62.4	23.2	0	0	1	MMF	1	1	14	1.56863	7.54582	0	1	0	0	14.5	4	151	0.92	0.94	88	6.8	9.6	2.8	53	119	154	4.92881	74.1648	0.06
199	170.2	91.8	31.7	0	0	1	MMF	1	1	37	1.31492	8.50593	0	0	0	0	13.8	4.2	104	1.62	1.55	48	6.6	9.3	2.6	32	132	158	5.79864	73.75	0.66
200	170	73.8	25.5	1	0	0	MMF	0	1	40	1.26582	7.71626	0	0	0	0	12.5	3.9	79	1.7	1.65	46	5.9	11	3.1	67	146	112	5.82452	73.5656	0.17
201	176.1	101.4	32.7	0	0	0	EVR	1	1	36	1.35593	8.97095	0	0	0	0	16	4.4	153	2.04	2.42	29	8.4	10.1	3.6	50	104	309	4.53793	73.9865	0.15
202	174.2	59.7	19.7	0	0	1	MMF	0	1	35	1.49925	7.33219	0	0	0	0	11.3	4.4	117	1.66	1.41	52	5.7	9.4	2.5	46	117	136	5.97287	73.7052	0.01
203	182	66.9	20.2	1	1	1	MMF	0	1	42	1.43472	7.80099	0	0	0	0	12.4	4.1	109	1.26	1.03	70	6	9.2	3.2	61	116	105	5.02988	74.4059	0.03
204	174.6	77.3	25.4	1	1	1	MMF	0	1	52	1.34228	7.88908	0	0	0	0	12.2	3.8	98	1.41	1.25	57	5.8	9.6	2.5	61	118	119	5.62734	73.703	0.14
205	169	64.9	22.7	0	0	0	EVR	0	1	30	1.21212	7.09359	0	0	0	0	13.3	4	87	1.82	1.94	38	5.5	9.4	2.8	88	62	118	4.99189	73.3753	0.01
206	170.7	79.5	27.3	0	1	1	MMF	1	1	25	1.15607	7.11773	0	1	0	0	14	3.9	169	1.82	2.05	35	6.5	9.6	3.2	114	118	142	4.74914	74.4035	0.06
207	161	50.5	19.5	1	1	0	MMF	0	0	27	1.36986	5.8794	0	0	0	0	14.2	3.9	114	0.88	0.83	91	6.8	9.6	3.9	93	123	46	5.09074	73.0964	0.07
208	173	54	18	1	1	0	MMF	0	1	30	1.321	8.19606	0	0	0	0	12.1	3.7	92	1.8	1.71	39	5.3	10.5	2.4	67	82	99	4.5374	74.6094	0.02
209	160	52	20.3	1	0	0	EVR	0	1	37	1.12045	7.49219	0	0	0	0	12	3.9	105	2.38	2.07	31	5.6	9.7	3	62	132	205	6.40253	73.5556	0.01
210	160	75	29.3	1	0	1	EVR	1	1	33	1.40746	8.75781	0	0	0	0	12.1	4.4	95	1.8	1.57	48	5.8	9.8	3.2	54	181	476	6.85653	73.3083	0.52
